# Supplementary material for: Ubenimex suppresses Pim-3 kinase expression by targeting CD13 to reverse MDR in HCC cells
Source: PubMed Central journal article supplement (PMC5641159; doi:10.18632/oncotarget.20194), 2017-08-10
Supplement: oncotarget-08-72652-s001.pdf [file oncotarget-08-72652-s001.pdf]

## Ubenimex suppresses Pim-3 kinase expression by targeting CD13 to reverse MDR in HCC cells

### SUPPLEMENTARY MATERIALS

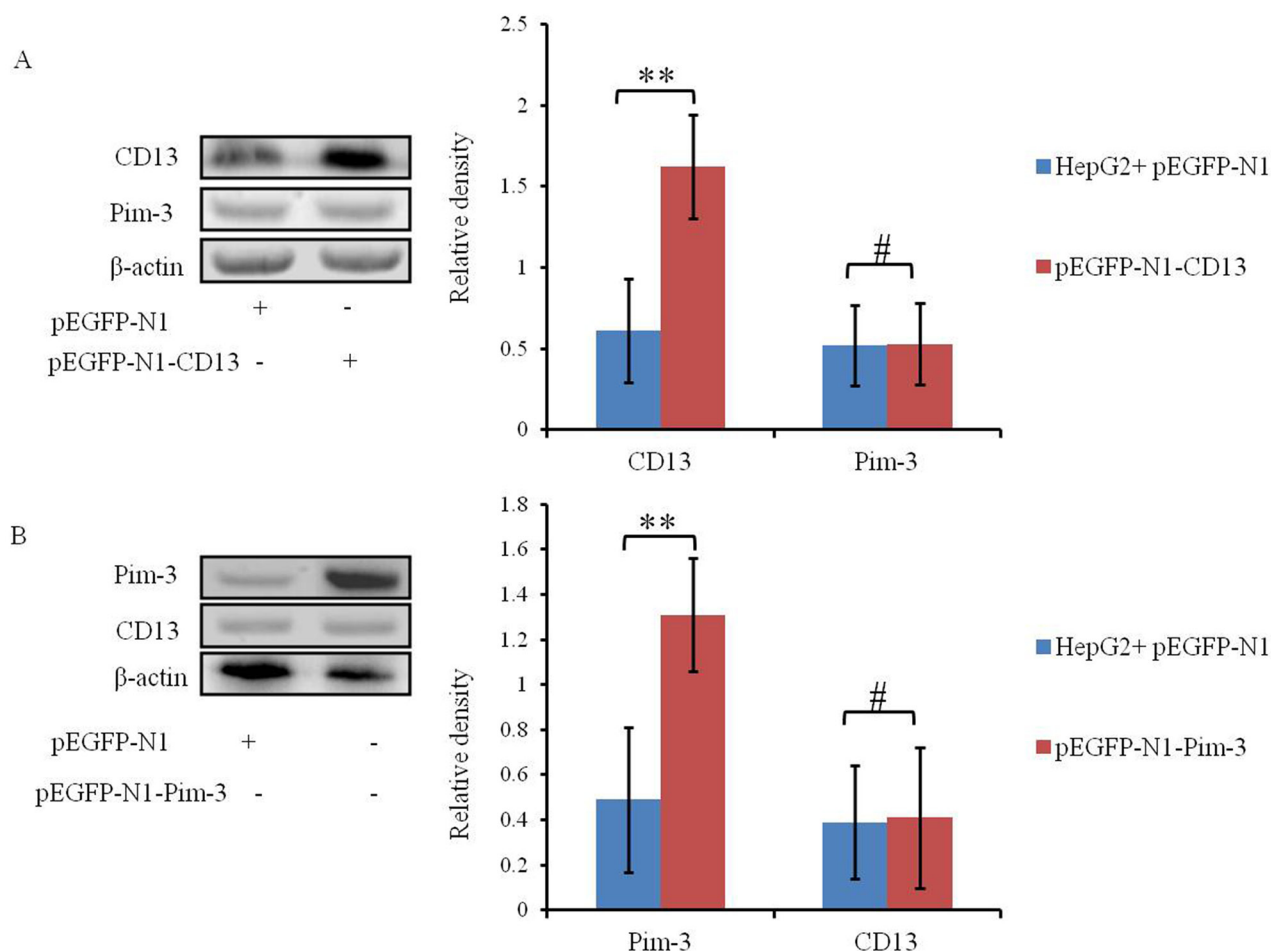

**Supplementary Figure 1: CD13 does not induce Pim-3 protein expression in HepG2 cells.** (A) Pim-3 and CD13 expression in HepG2 cells was assessed by Western blotting 24 h after transfection of pEGFP-N1-CD13 or pEGFP-N1 plasmid. (B) Pim-3 and CD13 expression in HepG2 cells was assessed by Western blotting 24 h after transfection of pEGFP-N1-Pim-3 or pEGFP-N1 plasmid. Data are representative (A and B, left panels) or means  $\pm$  SD (A and B, right panels) from three independent experiments. \*\*P < 0.01 and #P > 0.05.

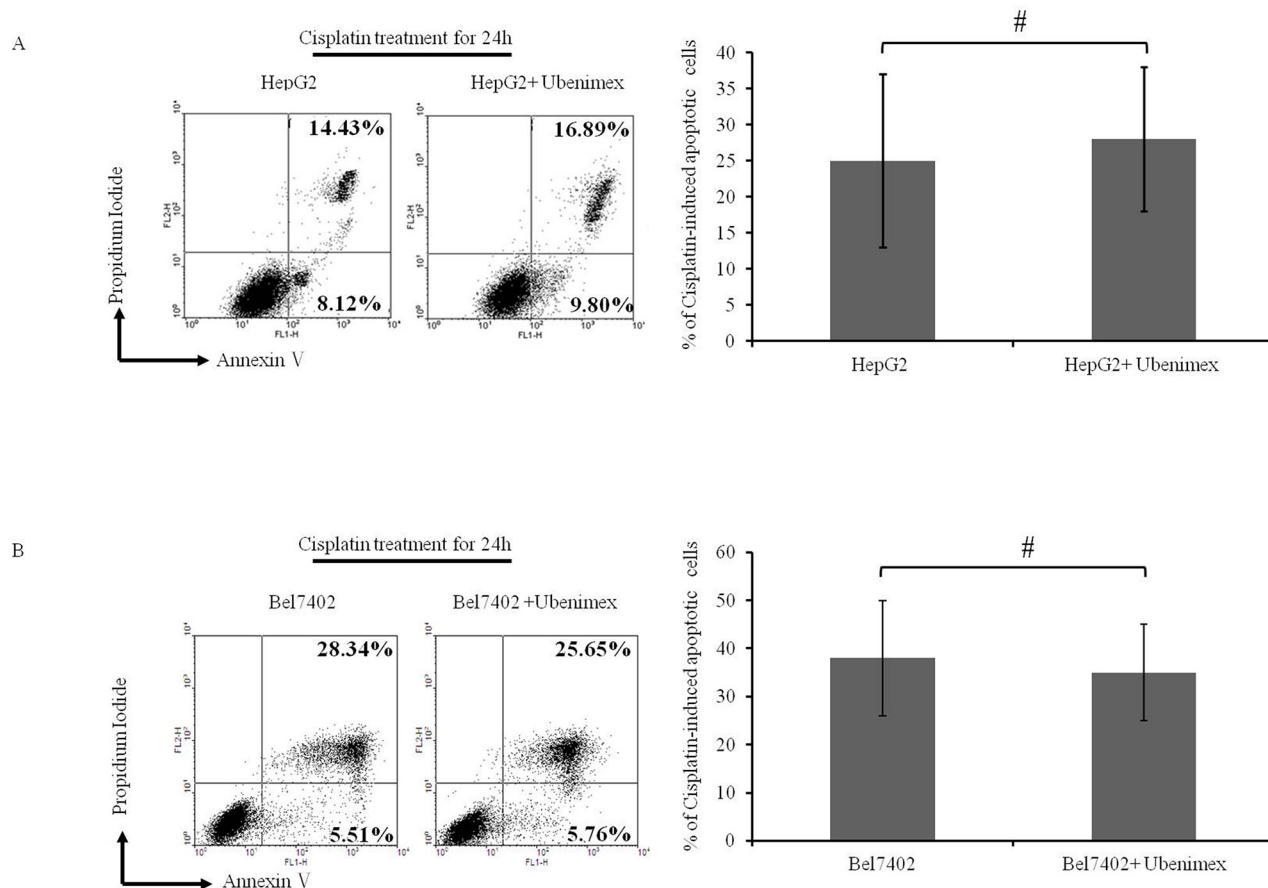

**Supplementary Figure 2: Ubenimex does not stimulate Cisplatin-induced apoptosis of HepG2 and Bel7402 cells. (A, B)** Apoptosis induced by Cisplatin in HepG2 (A) and Bel7402 (B) cells that were pretreated with or without Ubenimex for 24 h was detected by Annexin V/PI double staining, Data are shown as representative histograms (A and B, left panels) or means  $\pm$  SD (A and B, right panels) from three independent experiments. #P > 0.05.

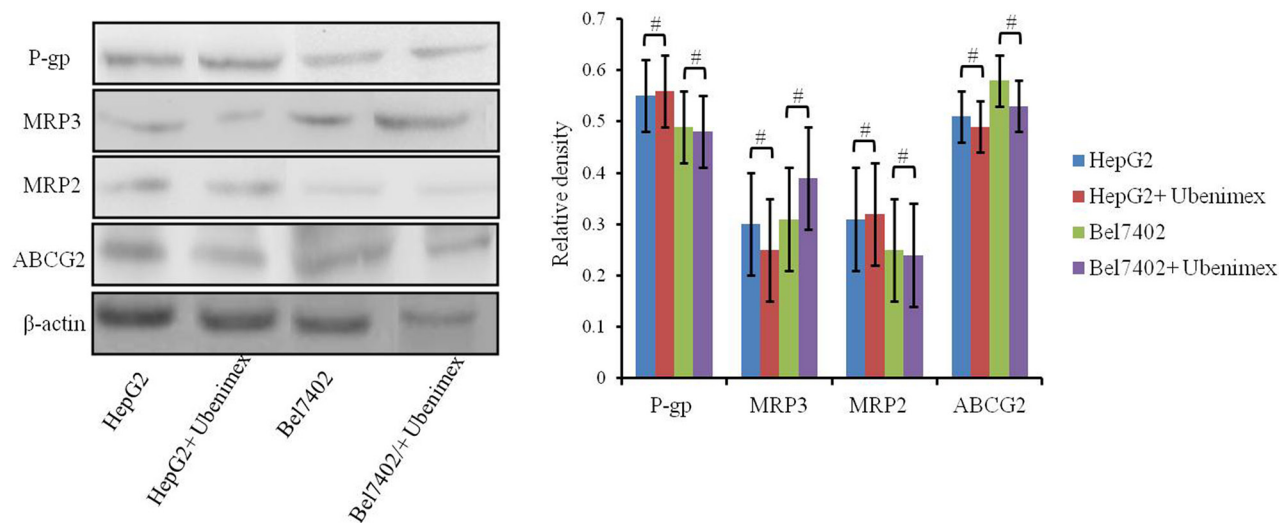

**Supplementary Figure 3: Ubenimex does not alter the abundance of MRPs in HepG2 and Bel7402 cells.** Protein expression of P-gp, MRP3, MRP2 and ABCG2 in HepG2 and Bel7402 cells with or without 24 h Ubenimex treatment were determined by Western blotting. Data are shown as representative images (left panels) or means  $\pm$  SD (right panel) from three independent experiments. #P > 0.05.

**Supplementary Table 1: IC50 values and RIs of HepG2 and Bel7402 cells treated with different chemotherapeutic agents in the presence or absence of Ubenimex for 24 h**

| Drugs          | HepG2        | HepG2+ Ubenimex | Bel7402      | Bel7402+Ubenimex |
|----------------|--------------|-----------------|--------------|------------------|
|                | IC50(μmol/L) | IC50(μmol/L)    | IC50(μmol/L) | IC50(μmol/L)     |
| 5-fluorouracil | 44.5±1.0     | 47.8±0.8#       | 38.3±0.7     | 40.9±2.1#        |
| Cisplatin      | 3.5±0.2      | 4.6±0.1#        | 3.9±0.8      | 5.3±1.3#         |
| Oxaliplatin    | 9.8±1.2      | 10.2±0.9#       | 8.9±0.4      | 9.0±0.2#         |

IC50 values and RI were determined by the CCK-8 method. Data are expressed as means±SD. #P>0.05 versus 5-fluorouracil, Oxaliplatin and Cisplatin without Ubenimex.
